# Supplementary material for: Regulatory T cells trigger effector T cell DNA damage and senescence caused by metabolic competition
Source: PubMed Central journal article supplement (PMC5770447; doi:10.1038/s41467-017-02689-5), 2018-01-16
Supplement: 41467_2017_2689_MOESM1_ESM.pdf [file 41467_2017_2689_MOESM1_ESM.pdf]

## Supplementary Figure 1

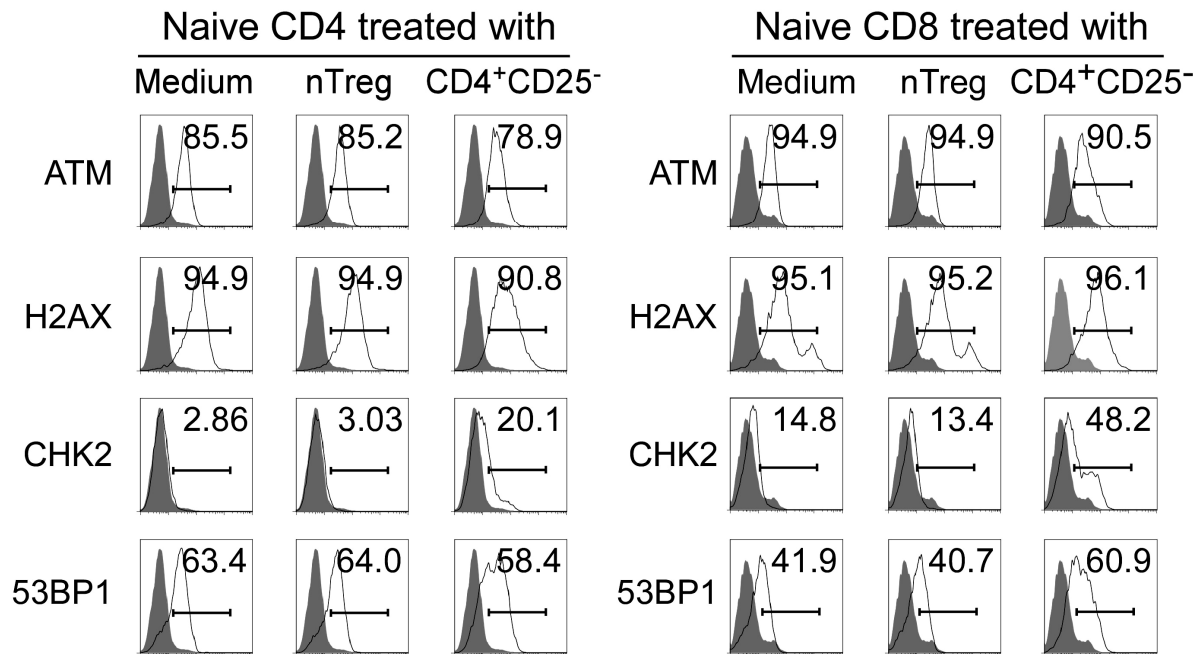

**Supplementary Figure 1. Treatment with nTreg cells did not alter the expression levels of total ATM and other associated molecules H2AX, 53BP1 and CHK2 in naïve CD4<sup>+</sup> and CD8<sup>+</sup> T cells.**

Anti-CD3 activated naïve CD4<sup>+</sup> and CD8<sup>+</sup> T cells were treated with nTreg or CD4<sup>+</sup>CD25<sup>-</sup> effector T cells (control). The ATM, H2AX, 53BP1 and CHK2 protein expression levels in treated naïve CD4<sup>+</sup> and CD8<sup>+</sup> T cells were analyzed by the flow cytometry.

Supplementary Figure 2

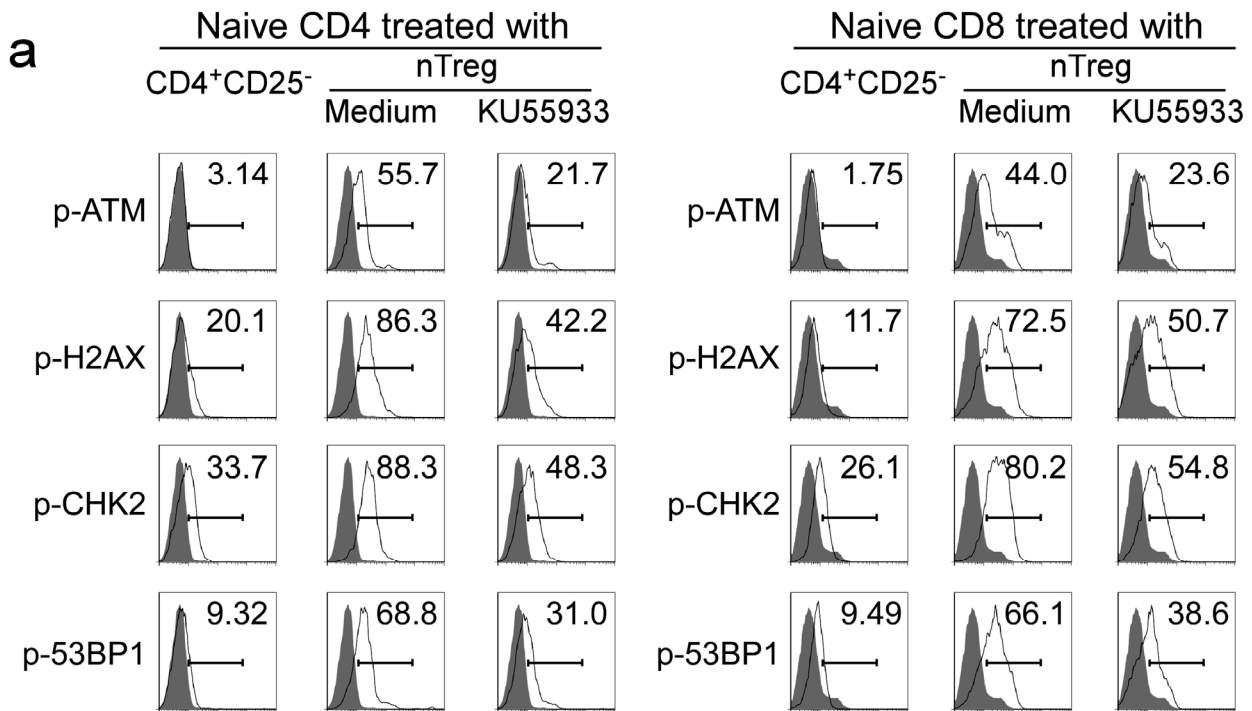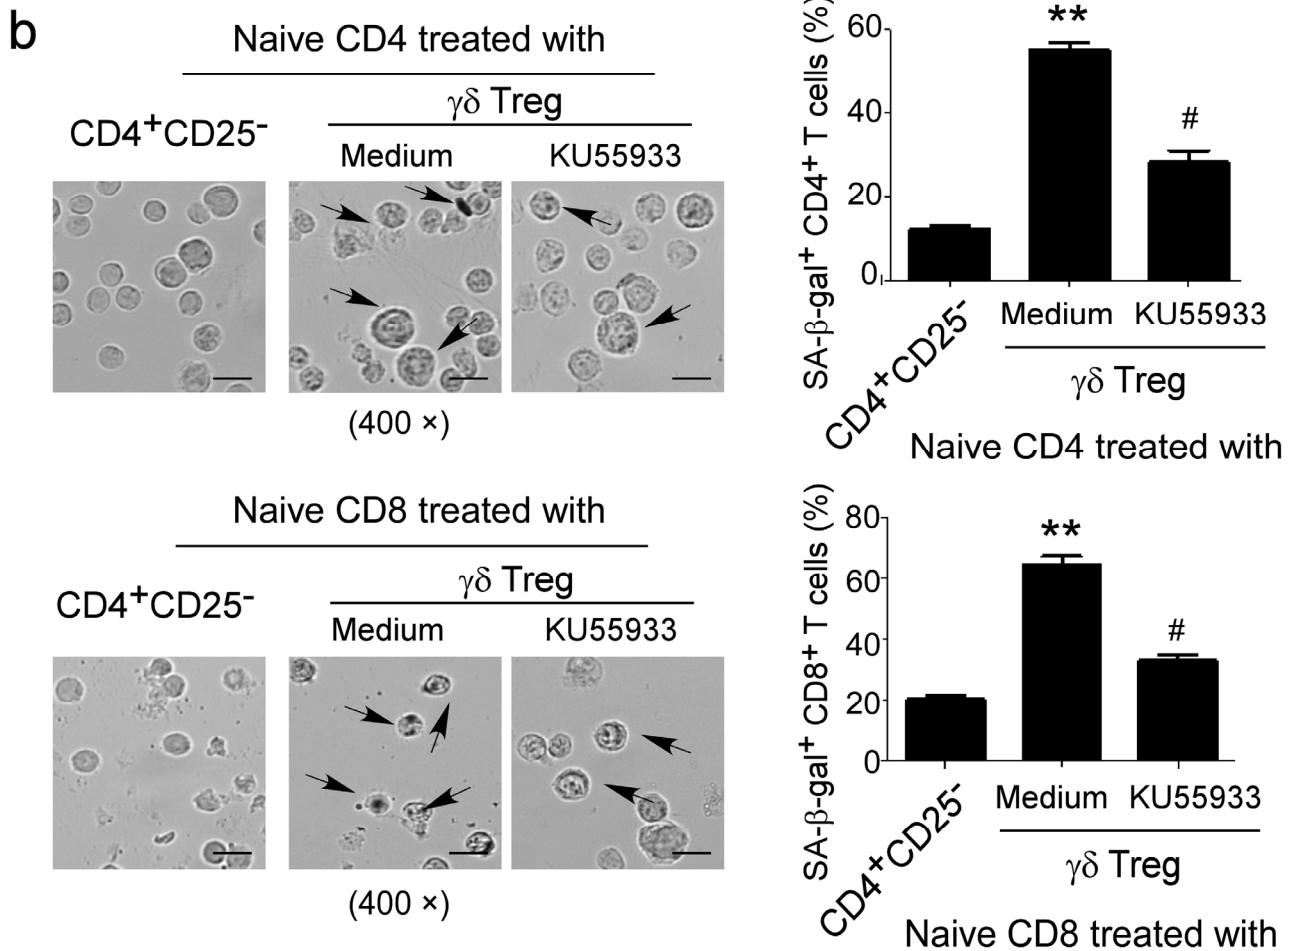

**Supplementary Figure 2. Human Treg-induced T-cell senescence involves the DNA damage response in responder T cells.**

**(a)** Pretreatment of responder T cells with the ATM inhibitor KU55933 significantly prevented up-regulation of the phosphorylated ATM and other associated molecules H2AX, 53BP1 and CHK2 in pre-activated naïve CD4<sup>+</sup> and CD8<sup>+</sup> T cells treated with nTreg cells. Anti-CD3-activated CD4<sup>+</sup> and CD8<sup>+</sup> T cells were pretreated with or without KU55933 (10 μM) for 1 day, and then co-cultured with nTreg cells for 3 days. The p-ATM, p-H2AX, p-53BP1, and p-CHK2 expression in treated naïve CD4<sup>+</sup> and CD8<sup>+</sup> T cells were analyzed by the flow cytometry. **(b)** Pretreatment of naïve CD4<sup>+</sup> and CD8<sup>+</sup> T cells with ATM inhibitor KU55933 significantly prevented T cell senescence induced by γδ Treg cells. Anti-CD3 activated T cells were pretreated with or without KU55933 (10 μM) for 1 day, and then co-cultured with γδ Treg cells for 3 days. SA-β-Gal expression in naïve CD4<sup>+</sup> and CD8<sup>+</sup> T cells was determined with SA-β-Gal staining. The SA-β-Gal positive T cells were identified with dark blue granules as indicated by the arrows. Scale bar: 20 μm. Data shown in the right panels are mean ± SD from three independent experiments. \*\*p<0.01, compared with the medium only and KU55933 treatment groups by paired t-test.

### Supplementary Figure 3

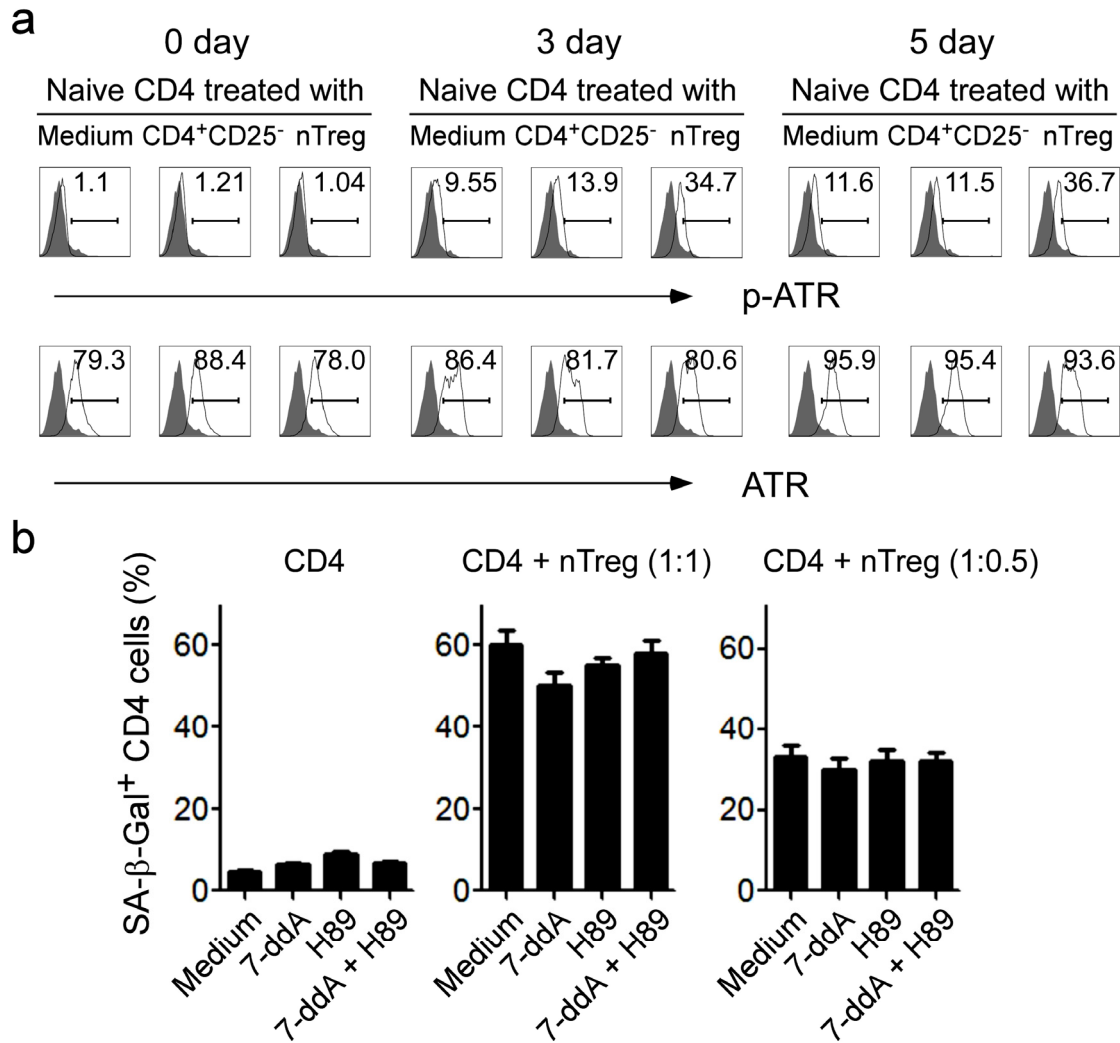

### Supplementary Figure 3. Human Treg-induced T-cell senescence involves the ATR activation in responder T cells.

**(a)** Phosphorylated activation of ATR in naïve CD4<sup>+</sup> T cells treated with human nTreg cells. Anti-CD3 activated naïve CD4<sup>+</sup> T cells were treated with nTreg or CD4<sup>+</sup>CD25<sup>-</sup> effector T cells (control) for 3 days. The p-ATR and total ATR expression in treated naïve CD4<sup>+</sup> T cells were analyzed by the flow cytometry. **(b)** cAMP was not involved in the induction of T cell senescence mediated by human nTreg cells. Treatment of Treg cells with 2', 5'-dideoxyadenosine (7ddA, an inhibitor for adenylate cyclase) and H89 (an inhibitor for PKA) cannot prevent induction of senescence in responder T cells mediated by nTreg cells. CFSE labeled CD4<sup>+</sup> T cells were co-cultured with or without nTreg cells for 3 days at ratio of 1:1 and 1:0.5 in the presence or absence of inhibitors 7ddA (40 μM), H89 (10 μM), or combination, and then purified by FACS sorting. The separated CD4<sup>+</sup> T cells were determined with SA-β-Gal expression.

# Supplementary Figure 4

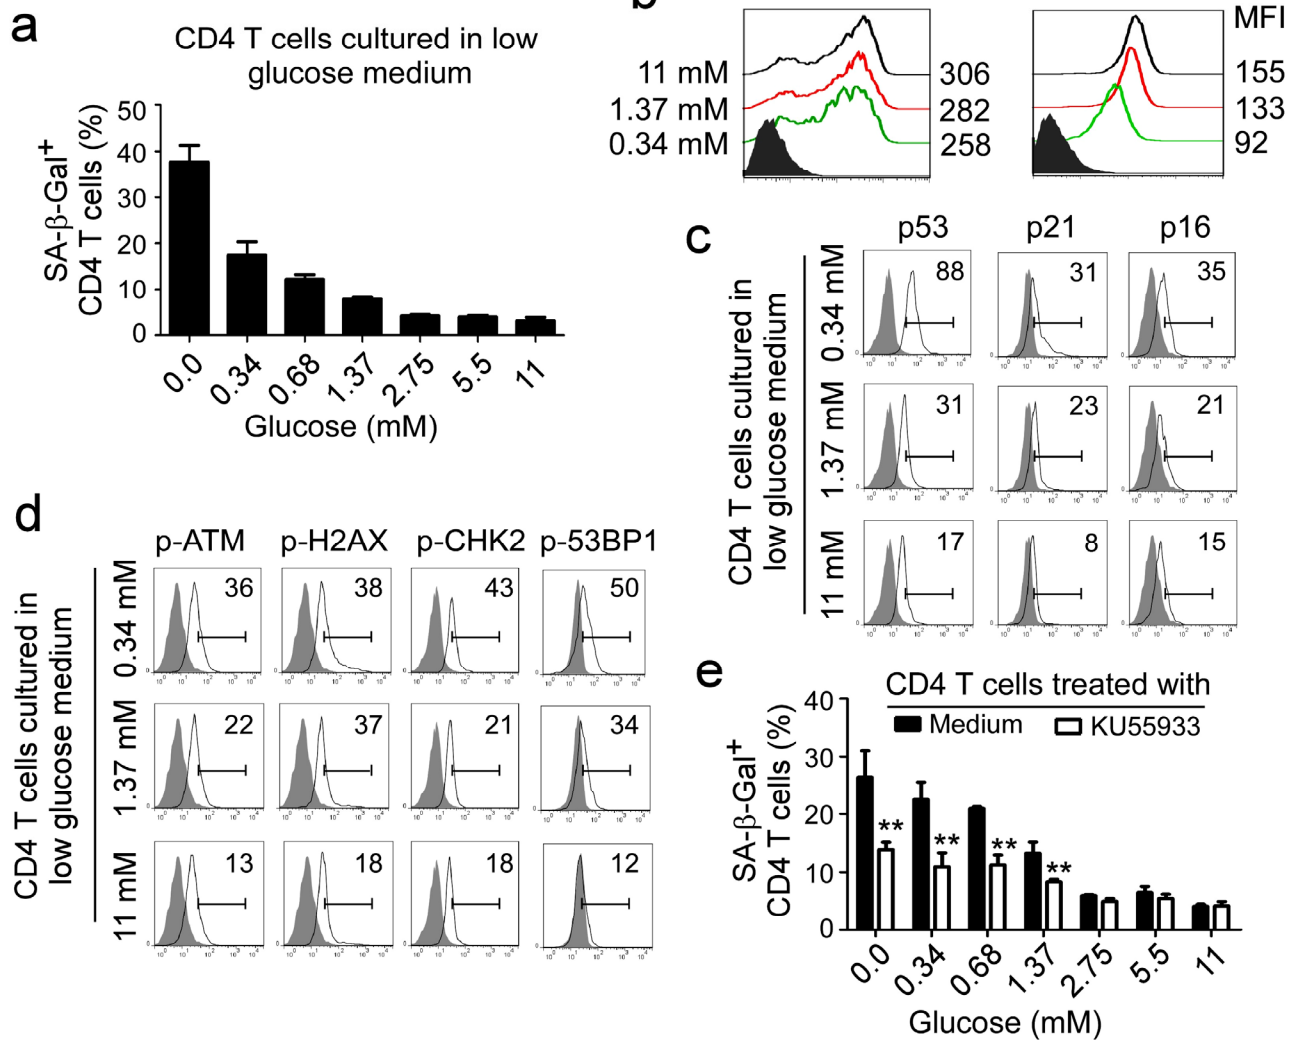

**Supplementary Figure 4. Low concentrations of glucose cause T cell DNA damage and senescence.**

**(a)** Significantly increased SA- $\beta$ -Gal<sup>+</sup> T cell populations were induced in naïve CD4<sup>+</sup> T cells cultured in the medium with low concentrations of glucose. Anti-CD3-activated naïve CD4<sup>+</sup> T cells were cultured with different concentrations of low glucose for 5 days. Data shown are mean  $\pm$  SD from CD4<sup>+</sup> T cells from three individual healthy donors. Normal medium with 11 mM glucose served as a control. SA- $\beta$ -Gal expression in CD4<sup>+</sup> T cells was determined. **(b)** Down-regulation of CD28 and CD27 in naïve CD4<sup>+</sup> T cells induced by the culture medium with low concentrations of glucose. Cell treatment and procedure were the same as in (a). CD27 and CD28 expression in treated naïve CD4<sup>+</sup> T cells were analyzed by the flow cytometry. Mean Fluorescence Intensity (MFI) was calculated as shown in the right. **(c)** Increased expression of cell cycle regulatory molecules p53, p21 and p16 in naïve CD4<sup>+</sup> T cells cultured with low concentrations of glucose medium. Cell treatment and procedure were the same as in (a). The p53, p21 and p16 expression in treated CD4<sup>+</sup> T cells were analyzed by the flow cytometry. **(d)** Phosphorylated activation of ATM and other associated molecules H2AX, 53BP1 and CHK2 in naïve CD4<sup>+</sup> T cells cultured with low concentrations of glucose medium. Cell treatment and procedure were the same as in (a). The p-ATM, p-H2AX, p-53BP1, and p-CHK2 expression in cultured naïve CD4<sup>+</sup> T cells were analyzed by the flow cytometry. **(e)** ATM specific inhibitor KU55933 significantly prevented CD4<sup>+</sup> T-cell senescence induced by the low glucose condition. Anti-CD3 pre-activated naïve CD4<sup>+</sup> T cells were cultured with different concentrations of glucose medium in the presence or absence of the ATM specific inhibitor KU55933 (10  $\mu$ M) for 5 days. SA- $\beta$ -Gal expression in CD4<sup>+</sup> T cells was determined. Data shown are mean  $\pm$  SD from three independent experiments. \*\*p<0.01, compared with the medium only group using paired t-test.

## Supplementary Figure 5

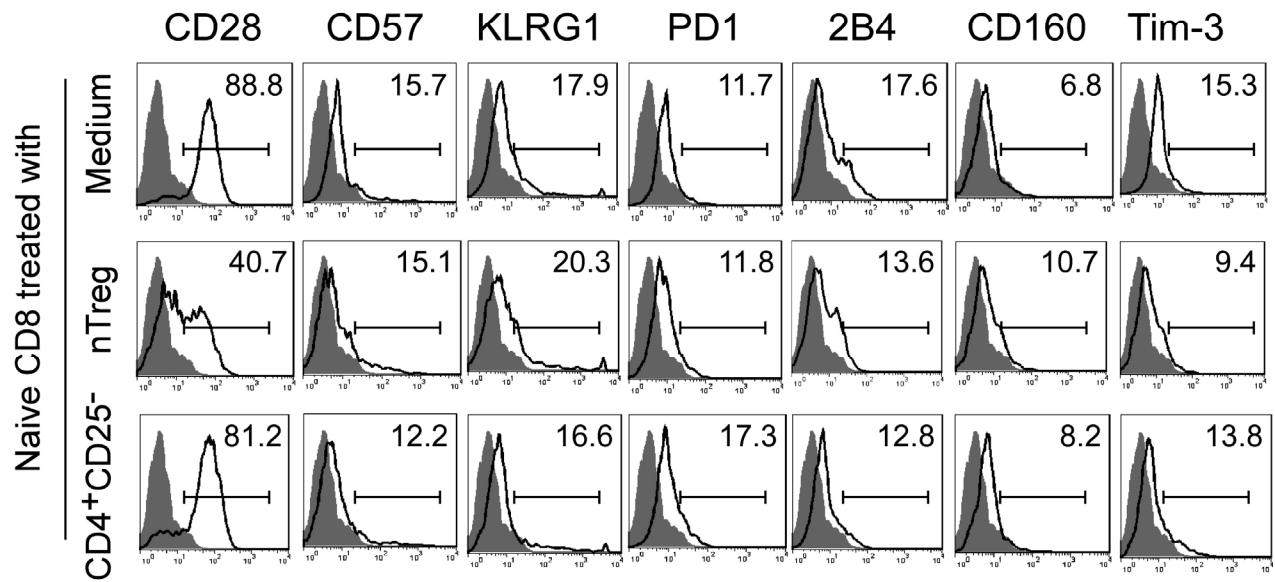

### Supplementary Figure 5. Human Treg cells induce senescence but not exhaustion in responder naive CD8<sup>+</sup> T cells.

Anti-CD3-preactivated naive CD8<sup>+</sup> T cells were co-cultured with nTreg or CD4<sup>+</sup>CD25<sup>-</sup> effector T cells (control) for 5 days, and then expression markers on treated T cells were determined by the flow cytometry analyses.

Supplementary Figure 6

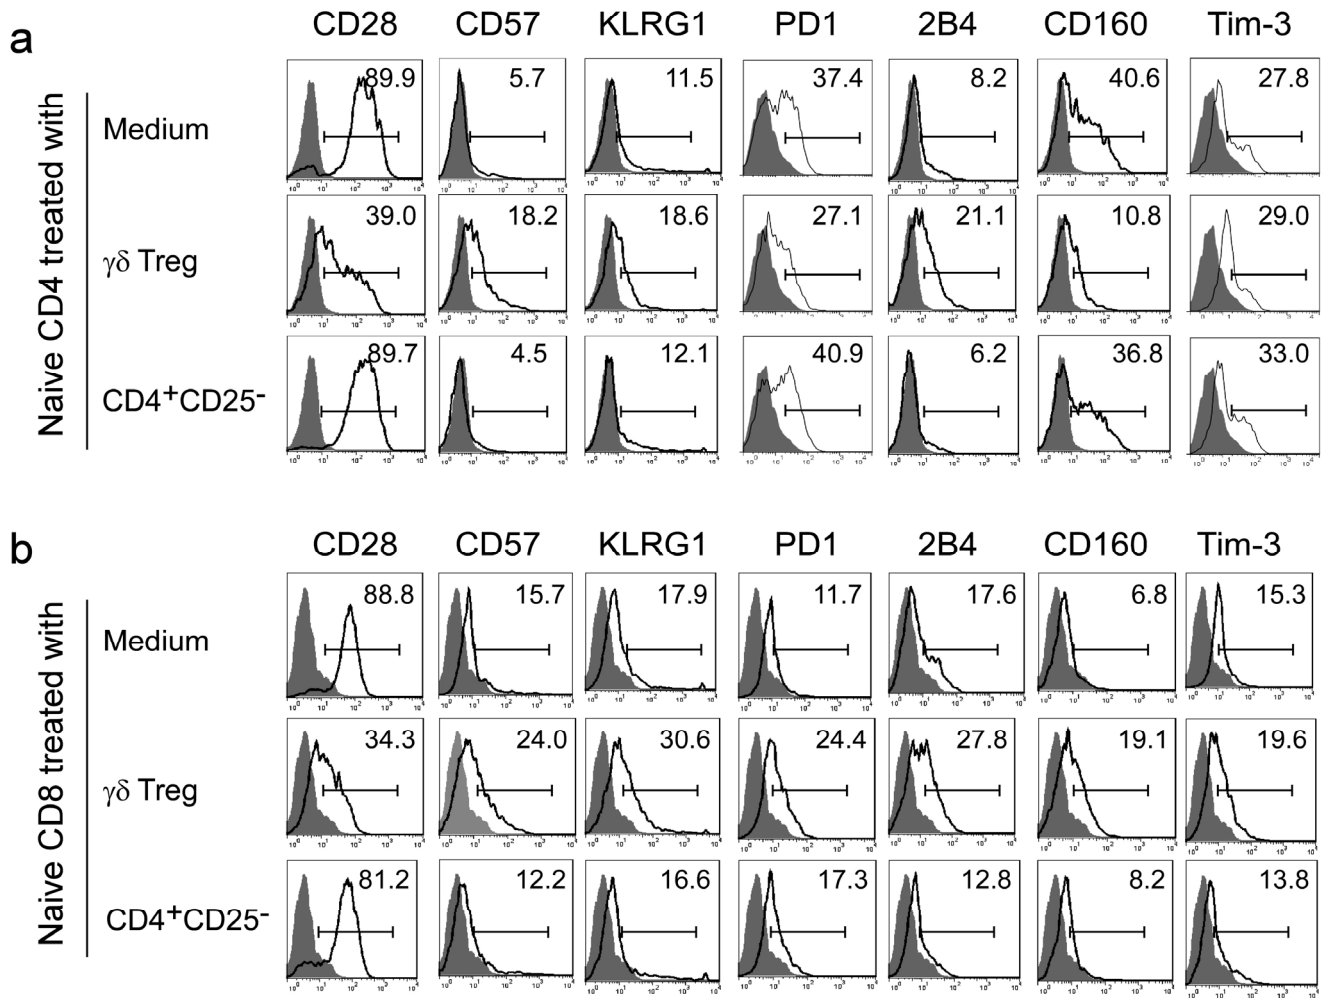

**Supplementary Figure 6. Senescent T cells induced by human  $\gamma\delta$  Treg cells are not exhausted T cells.**

(a) and (b) Human  $\gamma\delta$  Treg cell treatment did not promote the expression of exhaustion markers in senescent CD4<sup>+</sup> (in a) and CD8<sup>+</sup> (in b) T cells during the senescence development. Anti-CD3-preactivated naïve CD4<sup>+</sup> and CD8<sup>+</sup> T cells were co-cultured with  $\gamma\delta$  Treg or CD4<sup>+</sup>CD25<sup>-</sup> effector T cells (control) for 5 days, and then expression markers on treated T cells were determined by the flow cytometry analyses.



Supplementary Figure 7

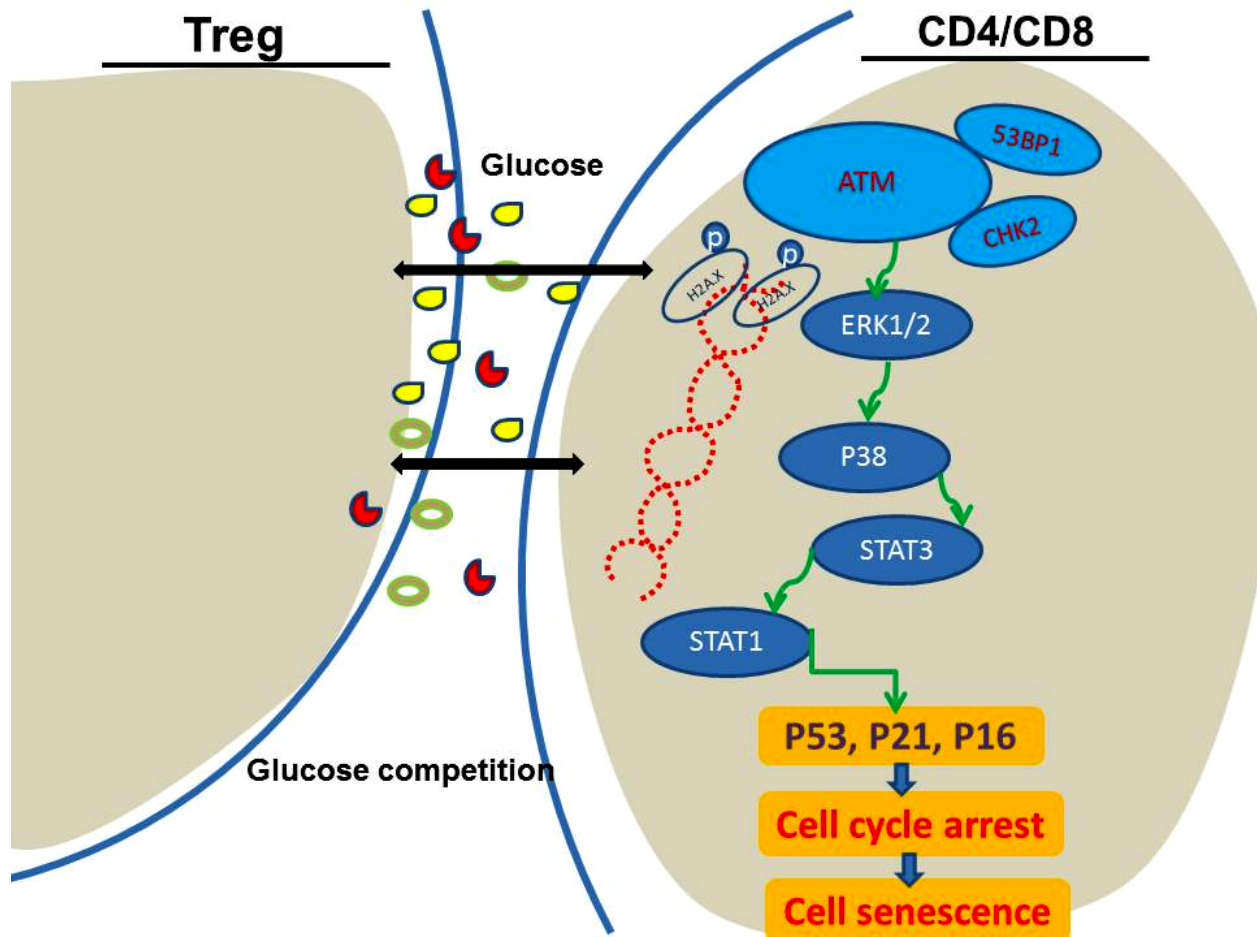

**Supplementary Figure 7. Diagram of the senescence induction in responder CD4<sup>+</sup> and CD8<sup>+</sup> T cells mediated by human Treg cells.**

Human Treg cells directly suppress responder T cell proliferation and initiate the ATM-associated DNA damage response through glucose competition, resulting in the cell cycle arrest and senescence in responder T cells. The ATM-associated DNA damage and cell senescence processes are molecularly controlled by MAPK ERK1/2 and p38 signaling functionally cooperating with transcription factors STAT1 and STAT3.

## Supplementary Figure 8

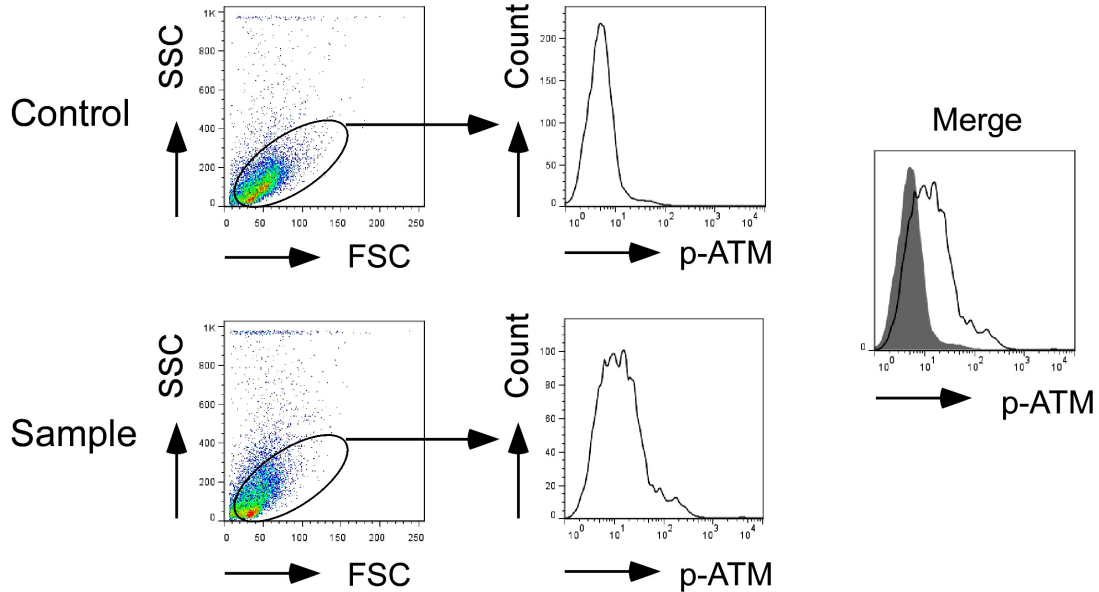

**Supplementary Figure 8. Diagram of the gating strategy utilized for the flow cytometry analyses of expression markers on T cells.**

This gating strategy analyzing p-ATM expression on T cells as a representative was utilized for all T cell markers determined by the flow cytometry after surface staining or intracellular staining with anti-human specific antibodies conjugated with PE or Alexa Flour488. Those analysis results are shown in Figures. 1, 2, 3, 6, 8 and Supplementary Figures 1-6.

**Supplementary Table 1. Primers used for real-time quantitative RT-PCR**

| <b>Genes</b>         | <b>Primers</b>                 |
|----------------------|--------------------------------|
| IL-1 $\beta$ Forward | ACAGATGAAGTGCTCCTTCCA          |
| IL-1 $\beta$ Reverse | GTCGGAGATTCGTAGCTGGAT          |
| IL-2 Forward         | GTCACAAACAGTGCACCTAC           |
| IL-2 Reverse         | CCCTGGGTCTTAAGTGAAAG           |
| IL-6 Forward         | GTAGCCGCCCCACACAGA             |
| IL-6 Reverse         | CATGTCTCCTTTCTCAGGGCT          |
| CAPASE3 Forward      | CGGATGGGTGCTATTGTGAGGCG        |
| CAPASE3 Reverse      | GGCCACGGATACACAGCCACAG         |
| CTLA4 Forward        | GTAATTGATCCAGAACCGTGCCCAG      |
| CTLA4 Reverse        | TTCTGGCTCTGTTGGGGGCAT          |
| DGKA Forward         | GGCTCGATGCCTAAGATGGGGA         |
| DGKA Reverse         | AGAGGCATCCACGCCAATAGAGA        |
| EGR2 Forward         | CGGAGTGGCCGGAGATGGCA           |
| EGR2 Reverse         | ACGGGAGCAAAGCTGCTGGG           |
| FYN Forward          | GCGGGGAGAGGACCATGTGAGT         |
| FYN Reverse          | AGAGGCAGGACTGGTCTTTTTCCA       |
| ITCH Forward         | ATCCCCGCACAGGAAAATCTGCC        |
| ITCH Reverse         | GTGGCATGGCCAGTTGCTGAC          |
| LCK Forward          | GGAGCTGGGACCCCCTATTTTAGCT      |
| LCK Reverse          | TGCCCTTGCCATCCAGTGGGA          |
| PGAM1 Forward        | AATCCCAGTCGGTGCCGCAT           |
| PGAM1 Reverse        | CATAGCCAGCATCTCGTAGCGCC        |
| PDCD1 Forward        | GTGGGGCTGCTCCAGGCATG           |
| PDCD1 Reverse        | GGTGGCGTTGTCCCCTTCGG           |
| PIM1 Forward         | GCGGCTTCGGCTCGGTCTAC           |
| PIM1 Reverse         | GTGCCATTAGGCAGCTCTCCCC         |
| RAB10 Forward        | AAGGAGAACAGATTGCAAGGGAGCA      |
| RAB10 Reverse        | GCTCTTCCAGCCTGTCACGCC          |
| SOCS2 Forward        | CCACCTGTCTTTGCCGCGGT           |
| SOCS2 Reverse        | CCCAGTACCATCCTGTCTGACCGA       |
| TLE4 Forward         | TCCTCTTCGGGGTCATTAAAGCCAA      |
| TLE4 Reverse         | CTGATGCGGTGCCGGGTGTC           |
| TOB1 Forward         | TGCTGCCACCAAGTTCGGCTC          |
| TOB1 Reverse         | AGCCAAGCCATACAGAGAGTGCA        |
| TRAF5 Forward        | ACTAACGGTTCTGAAGCGGAATGG       |
| TRAF5 Reverse        | TGGGGGTTGTGAAGCACCGAG          |
| Glut1 Forward        | AAT GGC TCC GGT ATC GTC AAC    |
| Glut1 Reverse        | GCT CAG ATA GGA CAT CCA GGG TA |
| Glut3 Forward        | GCTCTCTGGGATCAATGCTGTGT        |
| Glut3 Reverse        | CTTCCTGCCCTTTCCACCAGA          |

**Supplementary Table 2. Genes used for the comparison in senescent T cells and anergic T cells**

| <b>Gene</b> | <b>Description</b>                                                                         |
|-------------|--------------------------------------------------------------------------------------------|
| APOE        | Antagonizes posttranslational events in mitogen-activated T cells                          |
| ARF6        | ADP-ribosylation factor 6                                                                  |
| BAX         | BCL2-associated X protein                                                                  |
| CASP3       | caspase 3, apoptosis related cysteine protease                                             |
| CD7         | CD7 molecule, cell differentiation antigen 7                                               |
| CDKN1B      | cyclin-dependent kinase inhibitor 1B (p27, Kip1)                                           |
| CTLA4       | cytotoxic T-lymphocyte-associated protein 4                                                |
| DGKA        | diacylglycerol kinase, alpha 80kDa                                                         |
| EGR2        | early growth response 2                                                                    |
| FYN         | FYN oncogene related to SRC, FGR, YES                                                      |
| GBP3        | guanylate binding protein 3                                                                |
| ITCH        | itchy E3 ubiquitin protein ligase homolog                                                  |
| ITGB2       | integrin, beta 2 (complement component 3 receptor 3 and 4 subunit)                         |
| LCK         | lymphocyte-specific protein tyrosine kinase                                                |
| PDCD1       | programmed cell death 1                                                                    |
| PGAM1       | phosphoglycerate mutase 1                                                                  |
| PIM1        | pim -1 oncogene (proviral integration site 1 )                                             |
| RAB10       | RAB10, member RAS oncogene family ,G-protein signaling                                     |
| RNF128      | ring finger protein 128                                                                    |
| SLC3A2      | solute carrier family 3 (activators of dibasic and neutral amino acid transport), member 2 |
| SOCS2       | suppressor of cytokine signaling 2                                                         |
| TLE4        | transducin-like enhancer of split 4 (E(sp1) homolog, Drosophila)                           |
| TNFRSF1B    | tumor necrosis factor receptor superfamily, member 1B                                      |
| TNFSF9      | tumor necrosis factor (ligand) superfamily, member 9                                       |
| TOB1        | transducer of ERBB2, 1                                                                     |
| TRAF5       | TNF receptor-associated factor 5                                                           |
